# Supplementary material for: A defined syphilis vaccine candidate inhibits dissemination of Treponema pallidum subspecies pallidum
Source: PubMed Central journal article supplement (PMC5296639; doi:10.1038/ncomms14273), 2017-02-01
Supplement: ncomms14273-s1.pdf [file ncomms14273-s1.pdf]

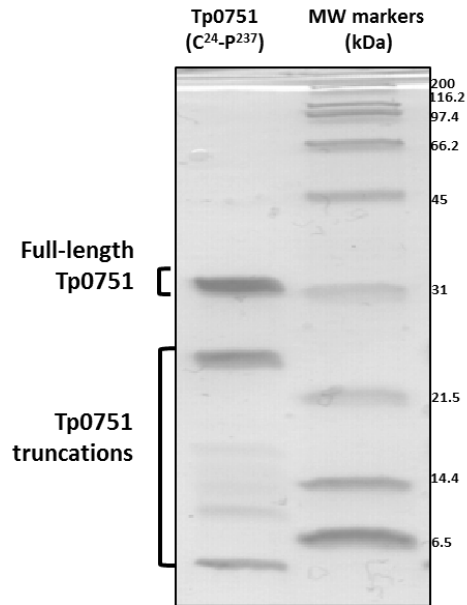

**Supplementary Figure 1. Recombinant Tp0751 preparation used for rabbit immunization.** SDS-PAGE of the recombinant Tp0751 (C<sup>24</sup>-P<sup>237</sup>) preparation used as an antigen for rabbit immunizations. As previously confirmed with mass spectrometry and Edman sequencing<sup>1</sup>, full-length Tp0751 corresponds to the 31 kDa band, while remaining bands represent truncated forms of the protein.

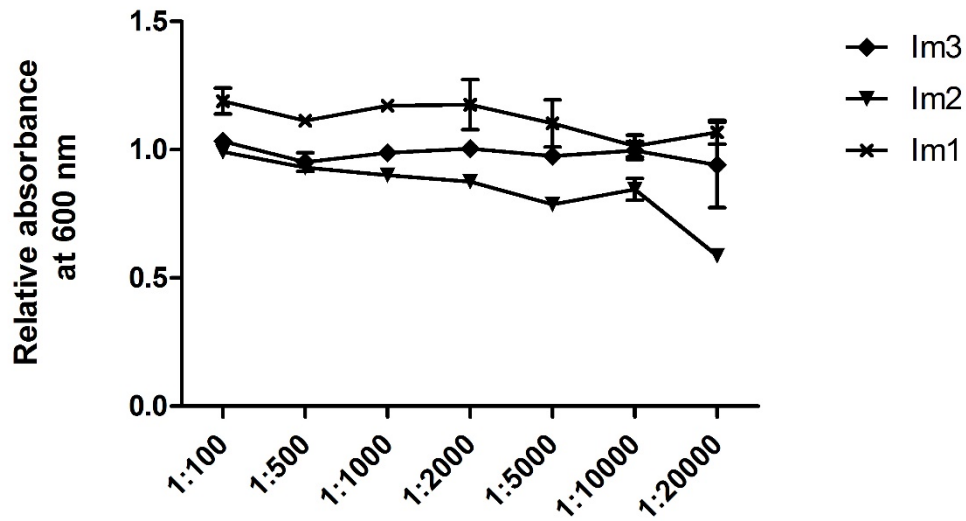

**Supplementary Figure 2. Rabbit serum titers against recombinant Tp0751 antigen.**

Blood samples from each immunized animal were collected seven days after the third immunization/second boost and prior to intradermal challenge with *T. pallidum*. Serum titers were established for the immunized animals Im1, Im2, and Im3 via enzyme-linked immunosorbent assays (ELISAs) with the recombinant Tp0751 antigen. Reactive serum was detected using goat anti-rabbit IgG HRP antibody and TMB (3,3',5,5'-Tetramethylbenzidine) peroxidase substrate and absorbance reading at 600 nm. Titers are displayed relative to serum reactivity from rabbit Im26, another Tp0751-immunized animal from an independent experiment used to generate specific antiserum.

**Supplementary Table 1. Serological analysis of animals challenged with *T. pallidum*.**

|           | Animal | Test | Pre-Bleed | Terminal Bleed Day 14 |
|-----------|--------|------|-----------|-----------------------|
| Control   | Ct1    | VDRL | NR        | R 1:4, WR 1:8         |
|           | Ct2    | VDRL | NR        | R 1:4, WR 1:8         |
| Immunized | Im1    | VDRL | NR        | R 1:2, WR 1:4         |
|           | Im2    | VDRL | NR        | R 1:8, WR 1:16        |
|           | Im3    | VDRL | NR        | R1:2, WR 1:4          |

NR: non-reactive

R: reactive

WR: weakly reactive

**Supplementary Table 2. Serological analysis of naïve recipient animals following popliteal lymph node transfer.**

|           | Donor Animal | Recipient Animal | Test    | Pre-Bleed | Day 17 | Day 31        | Terminal Bleed Day 39 | Terminal Bleed Day 42 | Day 51 | Day 73        | Day 106    | Terminal Bleed Day 134* | Day 147 | Day 175 | Day 185 |
|-----------|--------------|------------------|---------|-----------|--------|---------------|-----------------------|-----------------------|--------|---------------|------------|-------------------------|---------|---------|---------|
| Control   | Ct1          | R-Ct1            | VDRL    | NR        | WR 1:2 | R 1:4, WR 1:8 |                       | R 1:8, WR 1:16        |        |               |            |                         |         |         |         |
|           |              |                  | FTA-ABS | 0         | 0      | 2+            |                       | 4+                    |        |               |            |                         |         |         |         |
|           | Ct2          | R-Ct2            | VDRL    | NR        | WR 1:2 | R 1:2, WR 1:4 | R 1:16                |                       |        |               |            |                         |         |         |         |
|           |              |                  | FTA-ABS | 0         | 0      | 3+            | 4+                    |                       |        |               |            |                         |         |         |         |
| Immunized | Im1          | R-Im1            | VDRL    | NR        | NR     | NR            |                       |                       | NR     | NR            | NR         | NR                      | NR      | NR      | NR      |
|           |              |                  | FTA-ABS | 0         | 0      | 0             |                       |                       | 0      | 0             | 0          | 0                       | 0       | 0       | 0       |
|           | Im2          | R-Im2            | VDRL    | NR        | NR     | NR            |                       |                       | NR     | NR            | NR         | NR                      | NR      | NR      | NR      |
|           |              |                  | FTA-ABS | 0         | 0      | 0             |                       |                       | 0      | 0             | 0          | 0                       | 0       | 0       | 0       |
|           | Im3          | R-Im3            | VDRL    | NR        | NR     | NR            |                       |                       | WR 1:2 | R 1:1, WR 1:2 | WR 1:1-1:2 | R 1:1, WR 1:2           |         |         |         |
|           |              |                  | FTA-ABS | 0         | 0      | 1+            |                       |                       | 2+     | 3+            | 4+         | 4+                      |         |         |         |

NR: non-reactive

R: reactive

WR: weakly reactive

FTA-ABS scale: 1+, low reactivity; 4+, high reactivity

\* R-Im3 was euthanized on day 134

**Supplementary Reference:**

1. Houston, S., *et al.* Bifunctional role of the *Treponema pallidum* extracellular matrix binding adhesin Tp0751. *Infect. Immun.* **79**, 1386-1398 (2011)
